# Supplementary material
Source: PubMed Central journal article supplement (PMC3179059)
Supplement: 1106801108_pnas.201106801SI.pdf [file 1106801108_pnas.201106801SI.pdf]

# Supporting Information

Lu et al. 10.1073/pnas.1106801108

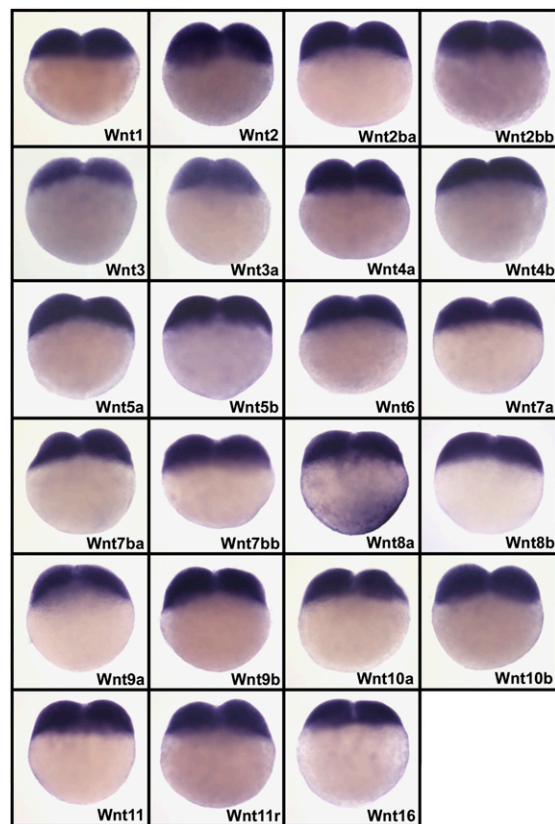

**Fig. S1.** Analysis of spatial localization of mRNAs coding for 23 zebrafish Wnt genes by whole mount in situ hybridization to identify those present in cortical cytoplasm of two-cell stage embryos. In situ hybridization was performed on wild-type embryos at the two-cell stage with specific antisense RNA probes corresponding to the different Wnts. The labeling reaction was performed for 24 h (10 times longer than usual) to detect possible low amounts of mRNA in the cortical cytoplasm. Due to strong overstaining, nonspecific labeling is observed in blastomeres for all Wnt probes. Only Wnt8a displays accumulation of mRNA in the cortical cytoplasm.

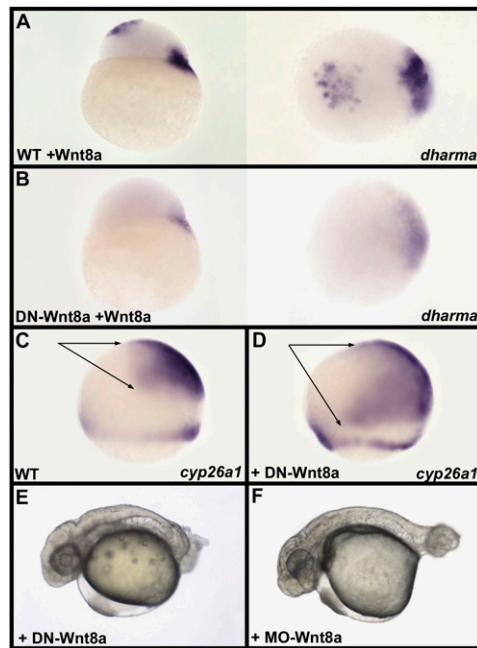

**Fig. S2.** Antagonistic activity of the dominant-negative form of Wnt8a. (A) Injection of 10 pg of Wnt8a mRNA into one animal pole blastomere at the 64-cell stage of a wild-type embryo results in ectopic expression of dharma at the animal pole of a sphere-stage embryo. (*Left*) Lateral view. (*Right*) Animal pole view of the same embryo oriented dorsal to the *Right*. (B) Injection of 10 pg of Wnt8a mRNA in one animal pole blastomere at the 64-cell stage in an embryo previously injected at the one-cell stage with 500 pg of DN-Wnt8a mRNA does not result in ectopic expression of dharma. In addition, endogenous dharma expression at the margin is strongly attenuated. The antagonistic effect of DN-Wnt8a on the induction of dharma at the animal pole is higher than the induction of endogenous dharma because the injection of Wnt8a mRNA in animal pole blastomeres is performed 2 h after fertilization and 1.5 h after injection of DN-Wnt8a, whereas endogenous Wnt8a mRNA present in the cortical cytoplasm can be translated earlier. (*Left*) Lateral view. (*Right*) Animal pole view of the same embryo oriented dorsal to the *Right*. (C and D) Compared with its expression in wild type (WT) (C) the forebrain and midbrain expression of *cyp26a1* (arrows) is strongly extended posteriorly (D) in embryos injected with 500 pg of DN-Wnt8a mRNA at the 8- to 16-cell stage. (E and F) At 30 hpf, embryo injected with 500 pg of DN-Wnt8a mRNA displays a phenotype (E) highly similar to the phenotype of Wnt8a morphant (F).

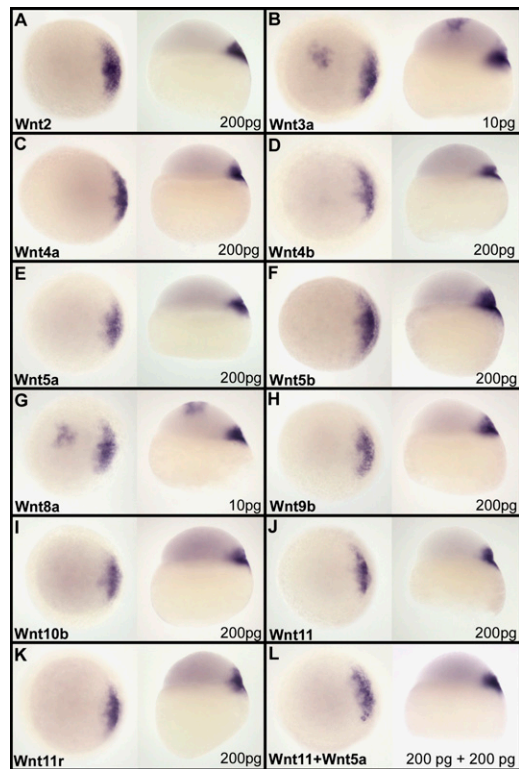

**Fig. S3.** Assay of activation of the maternal  $\beta$ -catenin signaling pathway by canonical and noncanonical Wnt ligands. mRNA coding for canonical or noncanonical Wnts was injected together with GFP mRNA into one animal pole blastomere at the 64-cell stage. Embryos displaying a fluorescent clone at the animal pole were fixed at the sphere stage and the activation of the maternal  $\beta$ -catenin visualized by looking, by whole mount in situ hybridization, at the induction of ectopic expression of dharm at the animal pole. Wnt3a (B) and Wnt8a (G) are the only Wnts able to induce ectopic dharm expression. This is observed with as little as 10 pg of mRNA injected. All other Wnt ligands, canonical Wnts [Wnt2 (A), Wnt9b (H), and Wnt10b (I)], noncanonical Wnts [Wnt4a (C), Wnt4b (D), Wnt5a (E), Wnt5b (F), Wnt11 (J), and Wnt11r (K)], or the combination Wnt11–Wnt5a (L), which has been described to act as dorsal determinant in amphibian, are unable to efficiently activate the maternal  $\beta$ -catenin signaling pathway and fail to induce ectopic expression of dharm at the animal pole, even for 200 pg of mRNA injected. For each Wnt, assayed embryos are presented in both animal pole view (Left) and lateral view (Right). The amount of mRNA injected is indicated in the Lower Right corner.

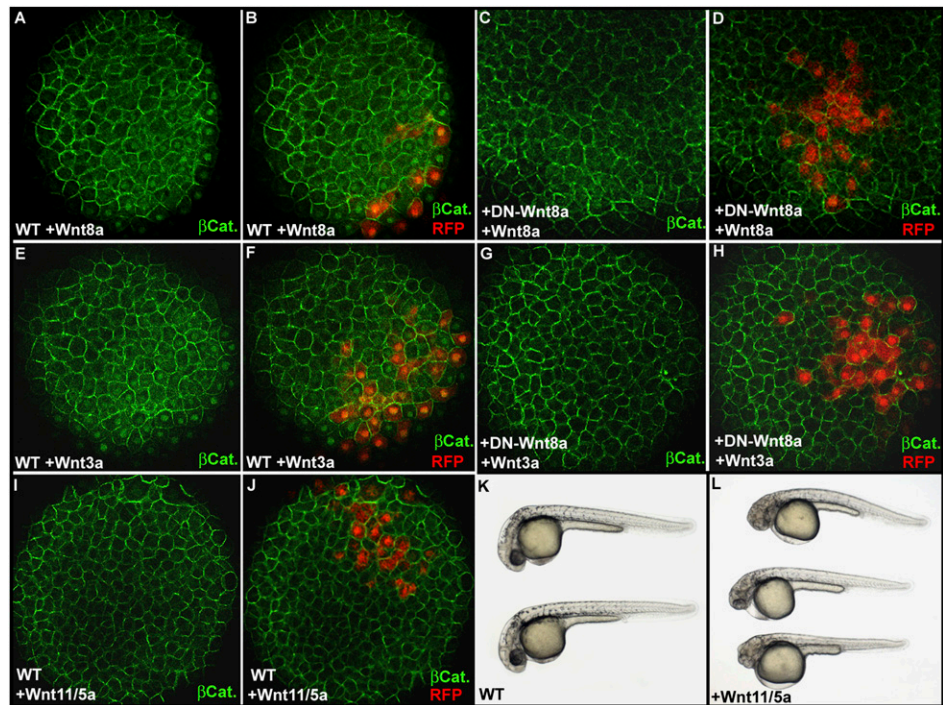

**Fig. 54.** Effect of ectopic expression of Wnt8a, Wnt3a, and Wnt11/5a on the intracellular localization of  $\beta$ -catenin as revealed by immunofluorescence. Immunofluorescence localization of  $\beta$ -catenin at 3 hpf (high stage) at the animal pole of an embryo injected with 10 pg of Wnt8a (A) or Wnt3a (E) mRNA together with 50 pg of red fluorescent protein (RFP) mRNA in one animal pole blastomere at the 64-cell stage. (B and F) Overlay of the green channel, for visualization of  $\beta$ -catenin, and the red channel, for visualization of cells expressing the RFP and secreting Wnt8a or Wnt3a, reveals the activation of the maternal  $\beta$ -catenin signaling pathway (accumulation of  $\beta$ -catenin into the nucleus) at a distance up to three cell diameters from cells secreting Wnt8a (B) or Wnt3a (F). Injection of 500 pg DN-Wnt8a mRNA at the one-cell stage prevents stimulation of the maternal  $\beta$ -catenin signaling pathway by Wnt8a (C and D) or Wnt3a (G and H). (I and J) In the same experimental conditions, injection of a mix of 200 pg of Wnt11 mRNA and 200 pg of Wnt5a mRNA fails to activate the maternal  $\beta$ -catenin signaling pathway and does not induce nuclear accumulation of  $\beta$ -catenin in animal pole blastomeres within or at the vicinity of the Wnt11/Wnt5a secreting clone. (L) Injection of the same mix of 200 pg of Wnt11 mRNA and 200 pg of Wnt5a mRNA at the one-cell stage induces cyclopia phenotypes characteristic of overexpression of noncanonical Wnts, demonstrating that translation from these mRNAs produces active Wnt proteins. (K) Wild-type embryo. Embryos in A–J are in animal pole view. Embryos in K and L are at 30 hpf and are in lateral view anterior to the *Left* and dorsal to the *Top*.



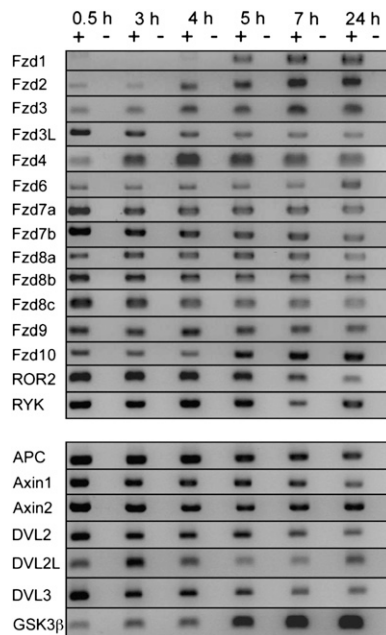

**Fig. S7.** RT-PCR analysis of the expression of Wnt receptors and downstream components of the canonical Wnt signaling pathway. Expression of the Wnt receptors (Fzd1, Fzd2, Fzd3, Fzd3L, Fzd4, Fzd6, Fzd7a, Fzd7b, Fzd8a, Fzd8b, Fzd9, Fzd10, ROR2, RYK) and of downstream components (APC, Axin1, Axin2, DVL2, DVL2L, DVL3, GSK3b) analyzed by RT-PCR at one- to two-cell stage (0.5 h), 1,000-cell stage (3 h), sphere stage (4 h), 40% epiboly (5 h), 60% epiboly (7 h), and at 24 hpf.

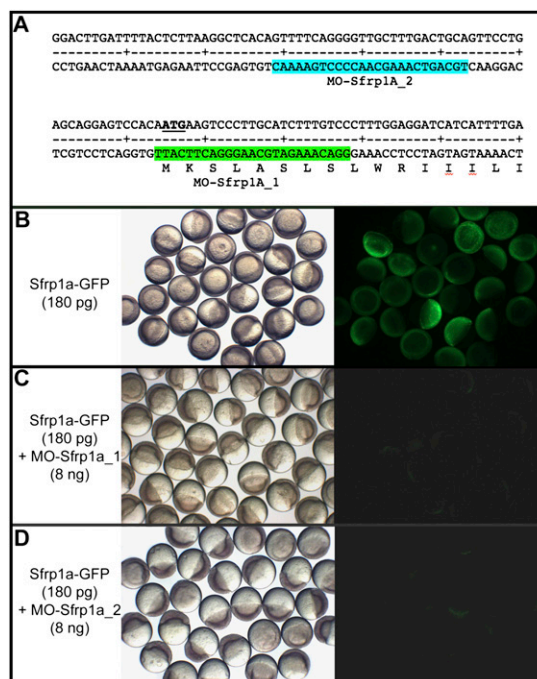

**Fig. S8.** Specificity of Sfrp1a morpholinos. (A) Position of antisense morpholinos designed to block Sfrp1a translation on the sequence of 5'-UTR and the 5' part of sfrp1a ORF. Injection of 180 pg of Sfrp1a-GFP mRNA at the one-cell stage results in embryos expressing the GFP at the late blastula stage (B). Coinjection of Sfrp1a-GFP mRNA with 8 ng of morpholino Sfrp1a\_1 (C) or of Sfrp1a\_2 (D) prevents translation of the Sfrp1a-GFP fusion protein. (Left) Bright field. (Right) Visualization of GFP fluorescence.







**Table S1. Cont.**

| Wnts |         | Primer sequence (5'–3')     | Size, bp |
|------|---------|-----------------------------|----------|
| DKK2 | Forward | TACGAGGAGTCGGTGTGTTGGA      | 699      |
|      | Reverse | AGCCTGGATCTGGAGAATGAGGTG    |          |
| DKK3 | Forward | TGATGAAGACTGCGGAGATGGAA     | 489      |
|      | Reverse | AAGTCGTTTAGGTACTTTGGTGC     |          |
| Frzb | Forward | TCTCACCTGAGGCAATAGTCAAAGC   | 386      |
|      | Reverse | ACCCATGATGATGTACTIONCTCGTTC |          |
| WIF1 | Forward | AAACAGAAACACCGGCCAGTGCG     | 410      |
|      | Reverse | TCCAAAAGAGGAACATTGACAGTAGG  |          |

**Table S2. Sequences of oligonucleotides used for analysis of expression of Wnt receptors and intracellular components of canonical Wnt/ $\beta$ -catenin**

| Name  |         | Primer sequence (5'–3')    | Size, bp |
|-------|---------|----------------------------|----------|
| ROR2  | Forward | GTCACGAGGAGTTGGAGTT        | 747      |
|       | Reverse | TATTGCCTAGTCGCACATAC       |          |
| RYK   | Forward | GTGGCTGTCTCCGACTT          | 922      |
|       | Reverse | GGCTCTGGCTGCTCTATTC        |          |
| Fz1   | Forward | ATCGCCTACATCGCCGATTCT      | 451      |
|       | Reverse | TCCTGATGCGGAACAACGACACG    |          |
| Fz2   | Forward | GGCTCGCTTTGCTCTGCTGTTG     | 1237     |
|       | Reverse | CGTCCACTTTATTACTGTAACCA    |          |
| Fz3   | Forward | CACAAGGCGCTCGTATTGTTAGA    | 422      |
|       | Reverse | TGAAGGTGGTATTGTAGGCAAGG    |          |
| Fz3L  | Forward | GATGTGGATTCTTTCGGTGGTTTC   | 740      |
|       | Reverse | TGTAGCAGACGGCGTAGAAGATGA   |          |
| Fz4   | Forward | AGACCGATCATTTTCTCAGCAT     | 219      |
|       | Reverse | GAGCGTTAAGATCACCCACCAGA    |          |
| Fz6   | Forward | CGCAGTAGCAGACGGAGATGAAGACG | 961      |
|       | Reverse | CTCCAGCAGATTGTTTCGGTTCG    |          |
| Fz7a  | Forward | CGAGTTCAATCTGGTGGGTCATT    | 659      |
|       | Reverse | GTTGCTGTTGCTGAGCCGTTTAT    |          |
| Fz7b  | Forward | CCAGATCGGATTTGAGGAATAGC    | 676      |
|       | Reverse | AAGGGACTGTGAGTTGAAGAGGG    |          |
| Fz8a  | Forward | GGCGTCGGACCCAATAAGAATAA    | 664      |
|       | Reverse | TCTGGTTGCCAACGTAGCAGATC    |          |
| Fz8b  | Forward | AAAAACAACAAGCCGACCAGGGAA   | 615      |
|       | Reverse | GAGCCAAGCAGCCATGTGGAAAT    |          |
| Fz8c  | Forward | ACCCTGTGGCTGGGATCTGTTAC    | 366      |
|       | Reverse | ATTTGAGCATGAAGACGGCGTAG    |          |
| Fz9   | Forward | TTCATCCTGACTGGCTTTGTGGC    | 433      |
|       | Reverse | TGTAGTGGCAGTACTGGTGCTG     |          |
| Fz10  | Forward | GACACCGTGCCTTCCGTTTGGTC    | 741      |
|       | Reverse | GCCTTGCCTGCTCGCACATCACT    |          |
| APC   | Forward | AGCACTTTAACCTACCGAAGC      | 611      |
|       | Reverse | ATGTAAGGCGAGCGAACAC        |          |
| Axin1 | Forward | AGCGATGGACGGCAATACA        | 1106     |
|       | Reverse | TCTCGTTCCTCAACACCC         |          |
| Axin2 | Forward | GGAAGAGGGTGAGACGACA        | 1184     |
|       | Reverse | AATGGGACGCACTGCTACT        |          |
| DVL2  | Forward | TGAACAAGCCGAACACTACAA      | 696      |
|       | Reverse | CGATACTGATGCCCAAGAA        |          |
| DVL2L | Forward | GCTTGCTGAAACACGGCTAT       | 443      |
|       | Reverse | GGCTGAACGCTCAACCCTC        |          |
| DVL3  | Forward | CATAGGTTCCGATGTGGTG        | 775      |
|       | Reverse | AATCGGTTGCTCTAGTTGG        |          |
| GSK3b | Forward | AGATAAAGATGGCAGTAAAGTG     | 257      |
|       | Reverse | AGAAGTAACGCAGACGAAC        |          |
